# Supplementary material for: Dissociation path competition of radiolysis ionization-induced molecule damage under electron beam illumination
Source: Royal Society of Chemistry journal article supplement (doi:10.1039/c9sc04100a), 2019-01-01
Supplement: c9sc04100a1.pdf [file c9sc04100a1.pdf]

# Molecules Fall Apart: Understanding Path Competition of Electron Beam Induced Dissociation

Molecular dissociation is a  
major problem in transmission  
electron microscopy (TEM)

but its mechanism  
remained unknown

Dissociation path depends on the ejected electron's orbital

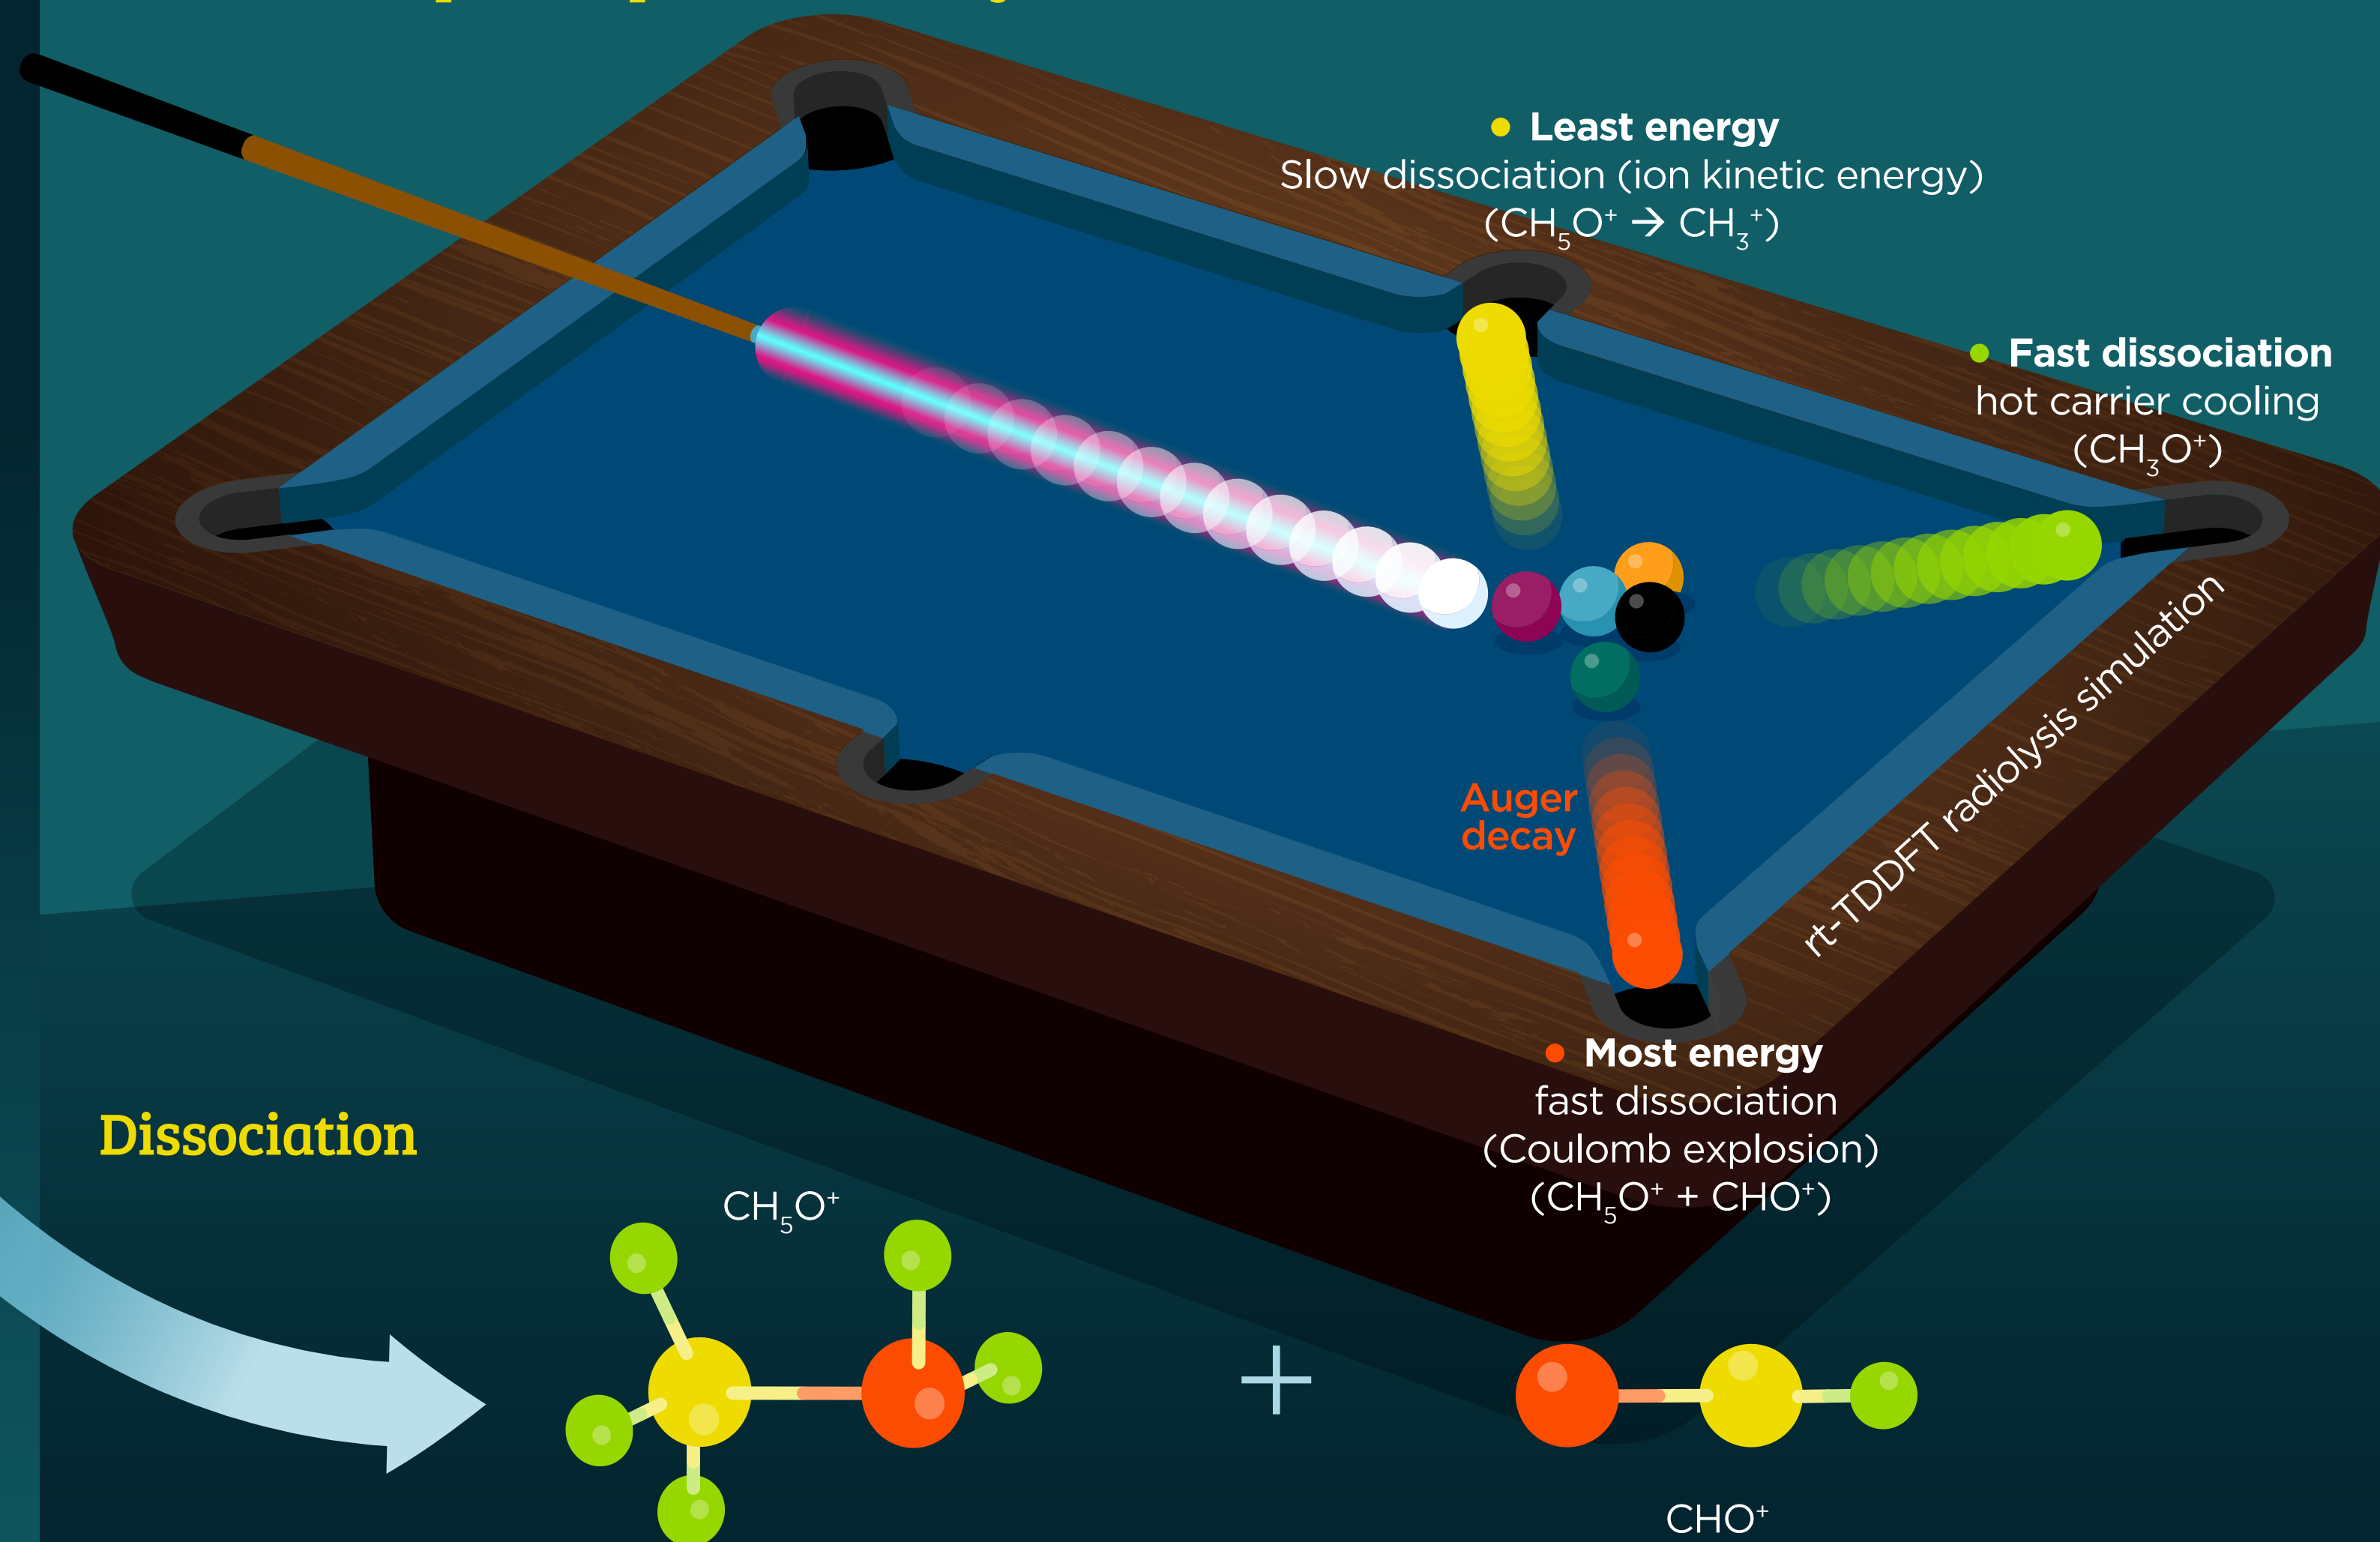

Understanding different paths of dissociation makes it possible to predict  
molecule damage and bond breaking under electron beam illumination

Chemical  
Science

PICK  
OF THE  
WEEK

Dissociation Path Competition of Radiolysis-Ionization  
induced Molecule Damage under Electron Beam Illumination

Cai *et al.* (2019) | DOI: 10.1039/C9SC04100A

ROYAL SOCIETY  
OF CHEMISTRY
