# Supplementary material for: Dissociation path competition of radiolysis ionization-induced molecule damage under electron beam illumination
Source: Royal Society of Chemistry journal article supplement (doi:10.1039/c9sc04100a), 2019-01-01
Supplement: c9sc04100a2.pdf [file c9sc04100a2.pdf]

Supplementary Information

**Dissociation Path Competition of Radiolysis-Ionization induced  
Molecule Damage under Electron Beam Illumination**

Zenghua Cai, Shiyu Chen and Lin-Wang Wang

|                                                              |    |
|--------------------------------------------------------------|----|
| <b>1. Method of calculating <math>\tau_{ij}</math></b> ..... | S3 |
| <b>2. Definition of the Dissociation Time</b> .....          | S3 |

## 1. Method of calculating $\tau_{ij}$

The decoherence time  $\tau_{ij}$  can be represented as:

$$\tau_{ij}(t_0) = \frac{\sqrt{2(kT)^2}}{\sqrt{S_{ij}(t_0)}}, \quad (\text{S1})$$

in which,  $k$  is the Boltzmann constant.  $T$  is the temperature.  $S_{ij}(t_0)$  can be calculated using the following formula:

$$S_{ij}(t_0) = \left\langle \left| \frac{d}{dt} (E_i(t_0, t) - E_j(t_0, t)) \right|^2 \right\rangle_t, \quad (\text{S2})$$

$$E_i(t_0, t) = \langle \phi_i(t_0) | H(t) | \phi_i(t_0) \rangle. \quad (\text{S3})$$

$\phi_i(t_0)$  is the wave function of the adiabatic state  $i$  at time  $t_0$ .  $H(t)$  is the Hamiltonian of the system at time  $t$ .  $\langle X \rangle_t$  represents the average of variable  $X$ .

## 2. Definition of the Dissociation Time

For the dissociation channel  $\text{C}_2\text{H}_6\text{O}_2^+ \rightarrow \text{CH}_3\text{O}^+ + \text{CH}_3\text{O}$ , it needs to break down the C-C bond, *i.e.*, bond 1 in Fig. S1(a). In our rt-TDDFT simulation, we recorded the change of C-C bond length with the time, as shown in Fig. S1(c). If the bond length of the C-C bond exceeds the 1.3 times of its original bond length and will not fluctuate any more, then the time is defined as the dissociation time, *i.e.*, 154.5 fs for the dissociation of ionized  $\text{C}_2\text{H}_6\text{O}_2^+$  as shown in Fig. S1(c). From Fig. S1(c), we can also see the process of the fluctuation before 154.5 fs. All the bond lengths of the ground state  $\text{C}_2\text{H}_6\text{O}_2$  molecule are listed in Fig. S1(b) for reference.

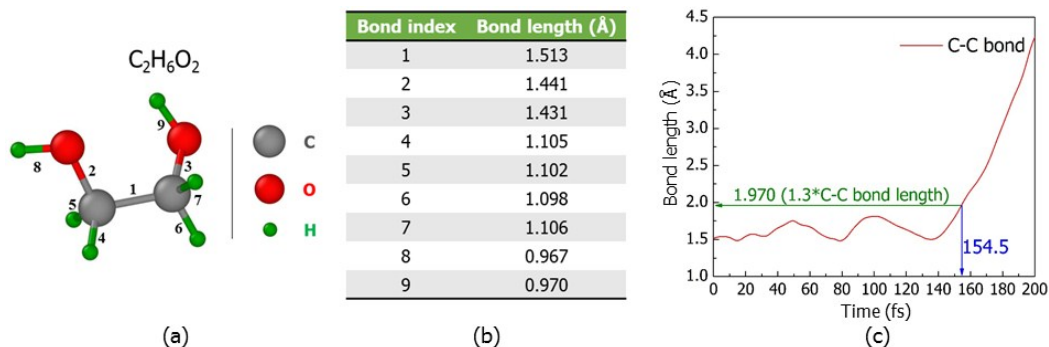

Fig. S1. (a) The ground state structure of  $\text{C}_2\text{H}_6\text{O}_2$  molecule. All the bonds have been labeled using the Arabic numerals. (b) The bond length (Å) of each bond as labeled in

(a). (c) The change of the C-C bond length with the time in one specific rt-TDDFT simulation which ends up with the  $C_2H_6O_2^+ \rightarrow CH_3O^+ + CH_3O$  dissociation.

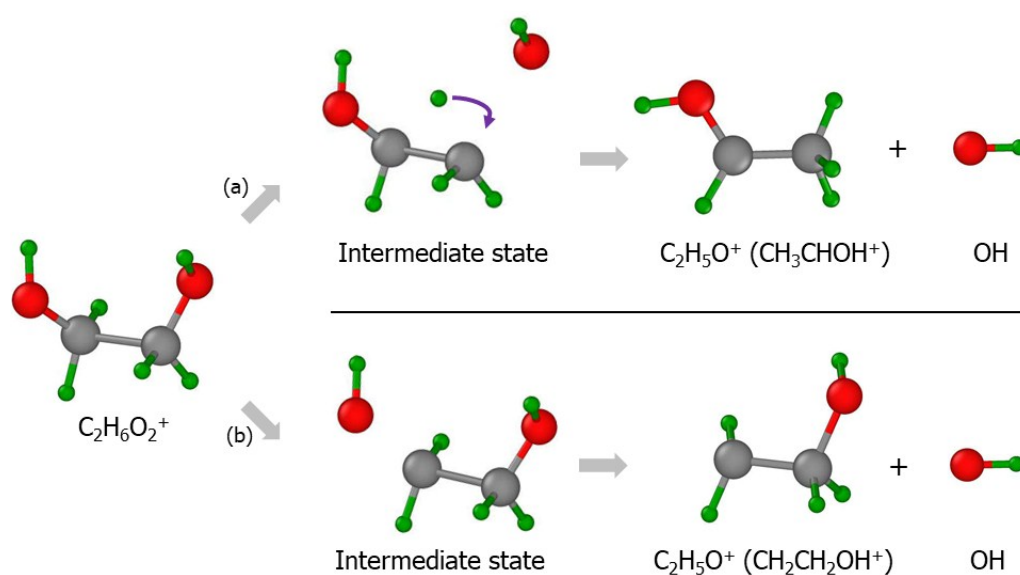

Fig. S2. (a) Pattern of dissociation of  $C_2H_6O^+ \rightarrow CH_3CHOH^+ + OH$ . (b) Pattern of dissociation of  $C_2H_6O_2^+ \rightarrow CH_2CH_2OH^+ + OH$ . Atomic labels are the same as those in Fig. S1(a).

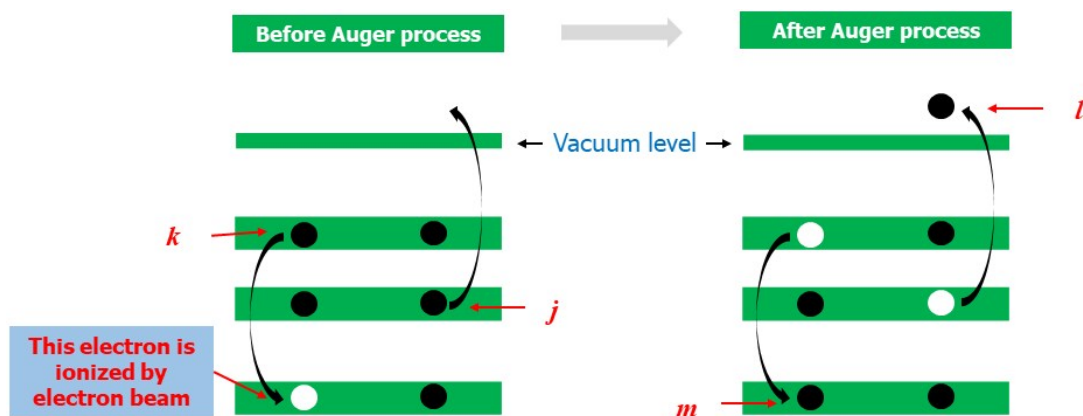

Fig. S3. The occupation of different electronic states before and after the Auger process.

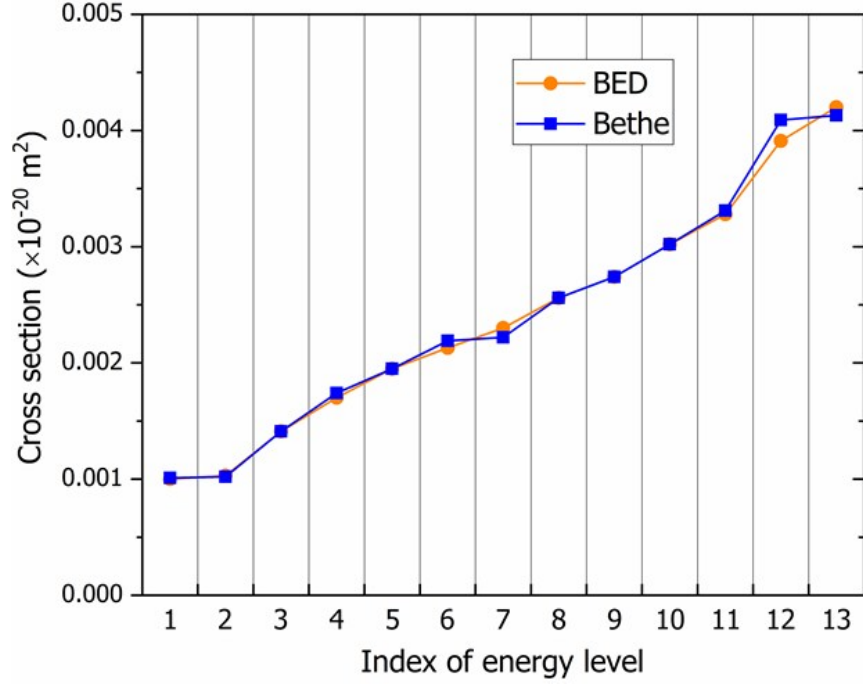

Fig. S4. The calculated ionization cross sections of all the 13 occupied levels of  $C_2H_6O_2$  under the illumination of electron beams with 100 keV incident energies. The orange circle is calculated using BED model, while the blue square is calculated using Bethe model.

Table S1. All the possible Auger channels. For the Auger channel 13\_3-9, 13, 3 and 9 represent the state  $k$ ,  $m$  and  $j$ , respectively, as shown in Fig. S3.

| Auger channel |
|---------------|---------------|---------------|---------------|---------------|---------------|
| 13_3-9        | 13_2-3        | 11_2-7        | 9_2-10        | 7_2-8         | 5_2-11        |
| 12_3-9        | 13_2-6        | 11_2-8        | 9_2-12        | 7_2-9         | 4_2-9         |
| 11_3-9        | 13_2-7        | 11_2-11       | 9_2-13        | 7_2-11        | 4_2-11        |
| 11_3-13       | 13_2-9        | 11_2-12       | 8_2-8         | 7_2-13        | 4_2-13        |
| 9_3-11        | 13_2-11       | 11_2-13       | 8_2-10        | 6_2-8         | 3_2-13        |
| 9_3_12        | 13_2-10       | 9_2-5         | 8_2-11        | 6_2-9         | 5_1-12        |

|        |         |       |        |        |
|--------|---------|-------|--------|--------|
| 9_3_13 | 12_2-9  | 9_2-6 | 8_2-12 | 6_2-11 |
| 8_3_13 | 12_2-12 | 9_2-7 | 7_2-5  | 6_2-13 |
| 7_3_12 | 11_2-4  | 9_2-8 | 7_2-7  | 5_2-7  |

Table S2. Total energies of all the fragments related to the single-ionization induced dissociation

| Neutral fragment  | Total energy (eV) | +1 charged fragment                                       | Total energy (eV) |
|-------------------|-------------------|-----------------------------------------------------------|-------------------|
| CH <sub>5</sub> O | -667.384          | C <sub>2</sub> H <sub>6</sub> O <sub>2</sub> <sup>+</sup> | -1263.908         |
| CH <sub>3</sub> O | -634.764          | C <sub>2</sub> H <sub>5</sub> O <sup>+</sup>              | -815.607          |
| CH <sub>2</sub> O | -619.541          | C <sub>2</sub> H <sub>4</sub> O <sup>+</sup>              | -797.931          |
| CHO               | -602.068          | C <sub>2</sub> H <sub>3</sub> O <sup>+</sup>              | -782.829          |
| CH <sub>3</sub>   | -201.465          | CH <sub>5</sub> O <sup>+</sup>                            | -660.584          |
| H <sub>3</sub> O  | -479.028          | CH <sub>3</sub> O <sup>+</sup>                            | -627.147          |
| H <sub>2</sub> O  | -465.822          | CHO <sup>+</sup>                                          | -593.762          |
| OH                | -446.909          | CH <sub>3</sub> <sup>+</sup>                              | -191.441          |
| H                 | -13.586           |                                                           |                   |
